# Supplementary material for: Nano-Sized NiO Immobilized on Au/CNT for Benzyl Alcohol Oxidation: Influences of Hybrid Structure and Interface
Source: MDPI journal article supplement (doi:10.3390/molecules26206276), 2021-10-16
Supplement: s1 [file s1]

Supporting information

Nano-sized NiO immobilized on Au/CNT for benzyl alcohol oxidation:

Influences of hybrid structure and interface

Yixue Zhou, Fengxiang Shan, Sihan Yang, Jingjie Luo,\* Changhai Liang\*

Laboratory of Advanced Materials & Catalytic Engineering (AMCE), School of Chemical

Engineering, Dalian University of Technology, Panjin Campus, Panjin 124221, China

\*Corresponding author. Tel/Fax: +86-411-84986353;

E-mail: [changhai@dlut.edu.cn](mailto:changhai@dlut.edu.cn) (C. Liang) & [jingjie.luo@dlut.edu.cn](mailto:jingjie.luo@dlut.edu.cn) (J. Luo)

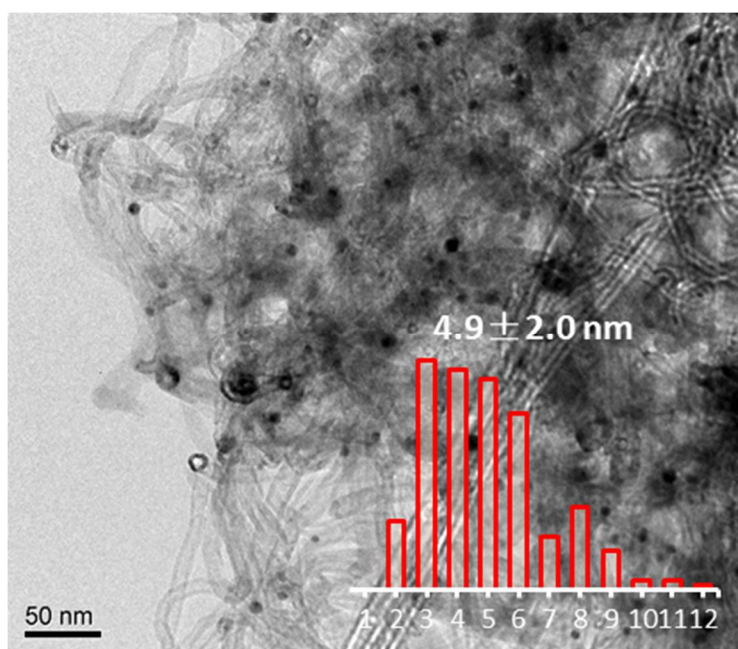

**Figure S1.** TEM image and size distribution of Au/CNT catalyst.

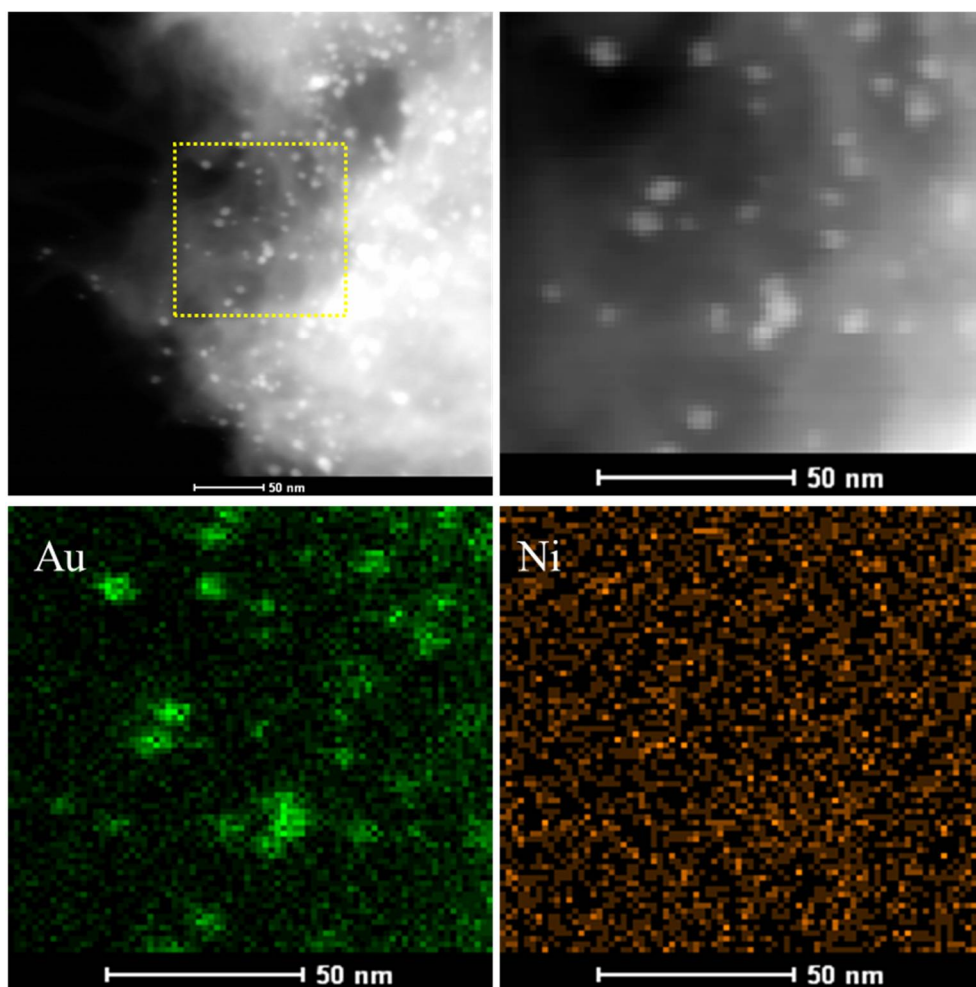

**Figure S2.** HAADF-STEM element mappings of the AuNi<sub>8</sub>/CNT catalyst.

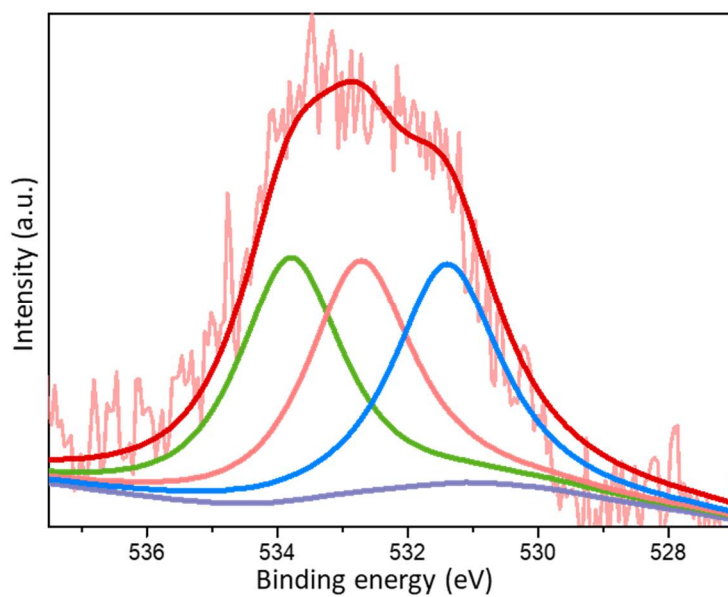

**Figure S3.** XPS spectra of the O 1s (c) core level of Au/CNT reference sample.

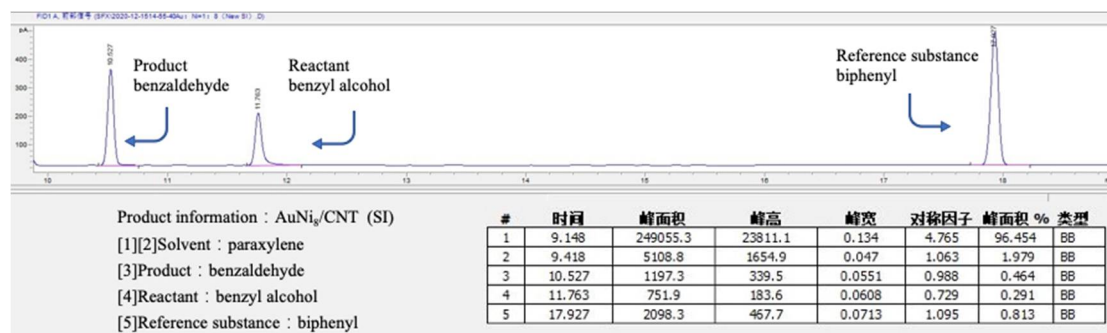

**Figure S4.** A typical GC analysis graph by Au reflecting the chromatographic peaks of benzaldehyde, benzyl alcohol, and biphenyl (substance) in the reaction mixture.

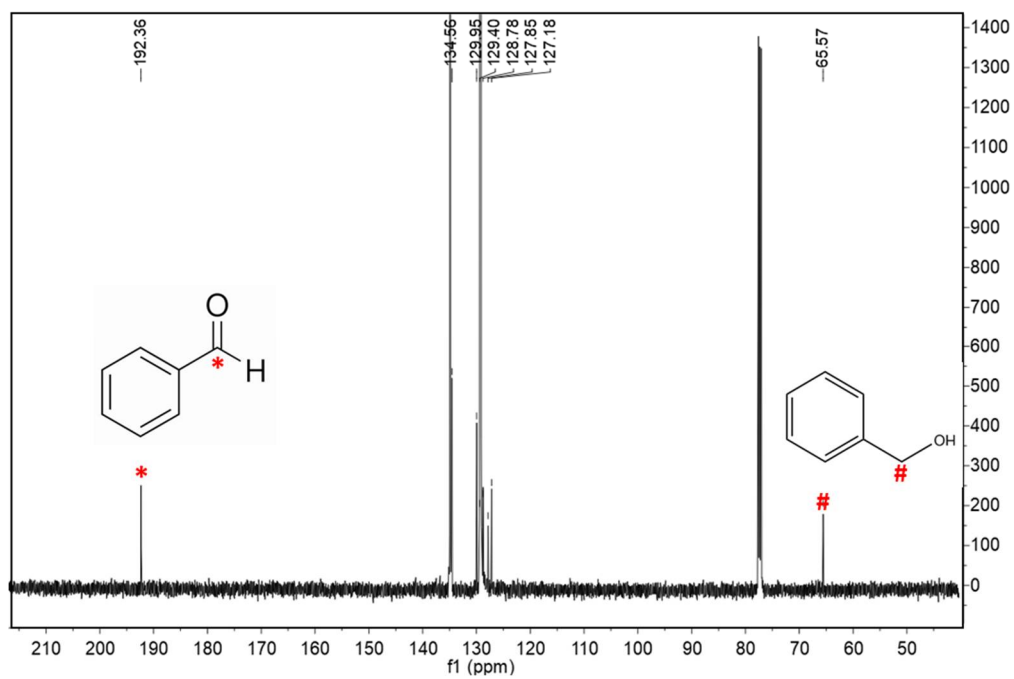

**Figure S5.**  $^{13}\text{C}$  NMR spectra of typical reaction mixture.

**Table S1** Surface composition of different gold catalysts.

| Catalyst                | Au 4 <i>f</i>       |                      | Ni 2 <i>p</i>       |                      | Au/C% <sup>a</sup> | Ni/Au <sup>b</sup> |
|-------------------------|---------------------|----------------------|---------------------|----------------------|--------------------|--------------------|
|                         | Au <sup>0</sup> (%) | Au <sup>δ+</sup> (%) | Ni <sup>0</sup> (%) | Ni <sup>2+</sup> (%) |                    |                    |
| Au/CNT                  | 100                 | 0                    | n.a.                | n.a.                 | 3.1                | n.a.               |
| AuNi <sub>2</sub> /CNT  | 100                 | 0                    | n.a.                | n.a.                 | 2.9                | n.a.               |
| AuNi <sub>8</sub> /CNT  | 90.1                | 9.9                  | 17.4                | 82.6                 | 3.4                | 11.2               |
| AuNi <sub>12</sub> /CNT | 86.1                | 13.9                 | 0                   | 100                  | 3.3                | 14.8               |

<sup>a</sup> Surface weight ratio of Au/C by XPS results.

<sup>b</sup> Surface atomic ratio of Ni/Au by XPS results.

**Table S2** Comparison of specific rate in the current work and the reported literature

| Catalyst                    | Reaction temperature | Specific rate ( $\mu\text{mol/g/s}$ ) | Literature |
|-----------------------------|----------------------|---------------------------------------|------------|
| Au/CNT                      | 50 °C                | 163                                   | This work  |
| AuNi <sub>8</sub> /CNT      | 50 °C                | 185                                   | This work  |
| AuNi <sub>12</sub> /CNT     | 50 °C                | 208                                   | This work  |
| AuNi <sub>16</sub> /CNT     | 50 °C                | 182                                   | This work  |
| 0.5Au-CeZr                  | 100 °C               | 370                                   | [1]        |
| RMC-Au                      | 130 °C               | 212                                   | [2]        |
| Au/CZ                       | 80 °C                | 106                                   | [3]        |
| Au-Pd/TiO <sub>2</sub>      | 90 °C                | 1239                                  | [4]        |
| Au-Pd/TiO <sub>2</sub> -001 | 120 °C               | 26002                                 | [5]        |

### References

1. Faqeeh, A. J.; Ali, T. T.; Basahel, S. N.; Narasimharao, K., Nanosized Samarium Modified Au-Ce<sub>0.5</sub>Zr<sub>0.5</sub>O<sub>2</sub> Catalysts for Oxidation of Benzyl Alcohol. *Mol. Catal.* **2018**, *456*, 10-21.
2. Oliveira, A. A. S.; Costa, D. S.; Teixeira, I. F.; Parreira, L. A.; Menini, L.; Gusevskaya, E. V.; Moura, F. C. C., Red Mud Based Gold Catalysts in the Oxidation of Benzyl Alcohol with Molecular Oxygen. *Catal. Today* **2017**, *289*, 89-95.
3. Olmos, C. M.; Chinchilla, L. E.; Villa, A.; Delgado, J. J.; Hungria, A. B.; Blanco, G.; Prati, L.; Calvino, J. J.; Chen, X. W., Size, Nanostructure, and Composition Dependence of Bimetallic Au-Pd Supported on Ceria-zirconia Mixed oxide Catalysts for Selective Oxidation of Benzyl Alcohol. *J. Catal.* **2019**, *375*, 44-55.
4. Hong, Y. L.; Jing, X. L.; Huang, J. L.; Sun, D. H.; Odoom-Wubah, T.; Yang, F.; Du, M. M.; Li, Q. B., Biosynthesized Bimetallic Au-Pd Nanoparticles Supported on TiO<sub>2</sub> for Solvent-Free Oxidation of Benzyl Alcohol. *ACS Sustainable Chem. Eng.* **2014**, *2* (7), 1752-1759.
5. Wang, Z.; Feng, J. J.; Li, X. L.; Oh, R. N.; Shi, D. D.; Akdim, O.; Xia, M.; Zhao, L.; Huang, X. Y.; Zhang, G. J., Au-Pd Nanoparticles Immobilized on TiO<sub>2</sub> Nanosheet as an Active and Durable Catalyst for Solvent-free Selective Oxidation of Benzyl Alcohol. *J. Colloid Interface Sci.* **2021**, *588*, 787-794.
